# Supplementary material for: Continuous administration of a p38α inhibitor during the subacute phase after transient ischemia-induced stroke in the rat promotes dose-dependent functional recovery accompanied by increase in brain BDNF protein level
Source: PubMed Central journal article supplement (PMC7717516; doi:10.1371/journal.pone.0233073), 2020-12-04
Supplement: pone.0233073.s001.pdf [file pone.0233073.s001.pdf]

**S1 Table. Modified Neurological Severity Score (mNSS) tests and scoring values.**

| <b>Motor test score values and descriptions</b><br>(Normal score = 0; maximum possible summary score = 6)                                 |                                                                                          |
|-------------------------------------------------------------------------------------------------------------------------------------------|------------------------------------------------------------------------------------------|
| 0 or 1*                                                                                                                                   | Flexion of forelimb after raising rat by the tail                                        |
| 0 or 1*                                                                                                                                   | Flexion of hindlimb after raising rat by the tail                                        |
| 0 or 1*                                                                                                                                   | Head moved >10° to vertical axis within 30 seconds after raising rat by the tail         |
| 0                                                                                                                                         | Normal walk after placing rat on the floor                                               |
| 1                                                                                                                                         | Inability to walk straight after placing rat on the floor                                |
| 2                                                                                                                                         | Circling toward paretic side after placing rat on the floor                              |
| 3                                                                                                                                         | Falls down to paretic side after placing rat on the floor                                |
| <b>Sensory test score values and descriptions</b><br>(Normal score = 0; maximum possible summary score = 2)                               |                                                                                          |
| 0 or 1*                                                                                                                                   | Placing test (visual and tactile test)                                                   |
| 0 or 1*                                                                                                                                   | Procioreptive test (deep sensation, pushing paw against table to stimulate limb muscles) |
| <b>Beam and balance test score values and descriptions</b><br>(Normal score = 0; maximum possible summary score = 6)                      |                                                                                          |
| 0                                                                                                                                         | Balances with steady posture                                                             |
| 1                                                                                                                                         | Grasps side of beam                                                                      |
| 2                                                                                                                                         | Hugs beam and 1 limb falls down from beam                                                |
| 3                                                                                                                                         | Hugs beam and 2 limbs fall down from beam, or spins on beam (60 seconds)                 |
| 4                                                                                                                                         | Attempts to balance on beam, but falls off (> 40 seconds)                                |
| 5                                                                                                                                         | Attempts to balance on beam, but falls off (> 20 seconds)                                |
| 6                                                                                                                                         | Falls off; no attempt to balance or hang on to beam (< 20 seconds)                       |
| <b>Reflex absence and abnormal movements test score values and descriptions</b><br>(Normal score = 0; maximum possible summary score = 4) |                                                                                          |
| 0 or 1*                                                                                                                                   | Pinna reflex (head shakes when auditory meatus is touched with cotton)                   |
| 0 or 1*                                                                                                                                   | Corneal reflex (eye blink when cornea is lightly touched with cotton)                    |
| 0 or 1*                                                                                                                                   | Startle reflex (motor response to a brief noise from snapping a clipboard paper)         |
| 0 or 1*                                                                                                                                   | Seizure, myoclonus, myodystony                                                           |

\*Score value of 1 was given for the inability to perform a test, or for the lack of a tested reflex, or for abnormal movement as described by Chen *et al.* [49].
