# Supplementary material for: Continuous administration of a p38α inhibitor during the subacute phase after transient ischemia-induced stroke in the rat promotes dose-dependent functional recovery accompanied by increase in brain BDNF protein level
Source: PubMed Central journal article supplement (PMC7717516; doi:10.1371/journal.pone.0233073), 2020-12-04
Supplement: pone.0233073.s002.pdf [file pone.0233073.s002.pdf]

**S2 Table. Body weight monitoring of the three treatment groups, including vehicle control, 1.5 mg/kg neflamapimod (NFMD), and 4.5 mg/kg NFMD throughout the study.**

| <b>Body weight monitoring time</b> | <b>Body weight Vehicle Mean±SD (g)</b> | <b>Body weight 1.5 mg/kg NFMD Mean±SD (g)</b> | <b>Body weight 4.5 mg/kg NFMD Mean±SD (g)</b> |
|------------------------------------|----------------------------------------|-----------------------------------------------|-----------------------------------------------|
| <b>Day 1</b>                       | 328.2±9.6                              | 328.5±11.3                                    | 325.3±11.1                                    |
| <b>Week 1</b>                      | 309.2±36.3                             | 325.7±26.8                                    | 321.1±27.2                                    |
| <b>Week 2</b>                      | 342.2±34.2                             | 353.9±24.9                                    | 353.3±23.8                                    |
| <b>Week 3</b>                      | 369.2±30.7                             | 378.5±23.1                                    | 374.8±21.4                                    |
| <b>Week 4</b>                      | 388.6±30.5                             | 397.3±25.1                                    | 393.9±25.5                                    |
| <b>Week 5</b>                      | 403.6±31.4                             | 412.4±25.6                                    | 407.5±21.1                                    |
| <b>Week 6</b>                      | 415.0±34.5                             | 421.5±26.8                                    | 417.8±23.0                                    |
