# Supplementary material for: Continuous administration of a p38α inhibitor during the subacute phase after transient ischemia-induced stroke in the rat promotes dose-dependent functional recovery accompanied by increase in brain BDNF protein level
Source: PubMed Central journal article supplement (PMC7717516; doi:10.1371/journal.pone.0233073), 2020-12-04
Supplement: pone.0233073.s003.pdf [file pone.0233073.s003.pdf]

**S3 Table. IL-1 $\beta$  (pg/ml) levels in the injured right brain hemisphere on Day 44 post stroke.**

| Vehicle     |                      | 1.5 mg/kg NFMD |                        | 4.5 mg/kg NFMD |                        |
|-------------|----------------------|----------------|------------------------|----------------|------------------------|
| Rat Number  | IL-1 $\beta$ (pg/ml) | Rat Number     | IL-1 $\beta$ * (pg/ml) | Rat Number     | IL-1 $\beta$ * (pg/ml) |
| 2           | 37.2                 | 1              | 35.2                   | 9              | 10                     |
| 8           | 57.5                 | 4              | 10                     | 12             | 10                     |
| 16          | 49.3                 | 5              | 33.2                   | 14             | 85.0                   |
| 20          | 24.4                 | 18             | 62.5                   | 15             | 116.8                  |
| 28          | 10                   | 23             | 10                     | 22             | 10                     |
| 29          | 32.8                 | 27             | 39.9                   | 24             | 10                     |
| 33          | 203.5                | 31             | 10                     | 25             | 45.1                   |
| 38          | 10                   | 40             | 10                     | 26             | 10                     |
| 43          | 166.1                | 41             | 10                     | 32             | 70.8                   |
| 45          | 70.8                 | 42             | 10                     | 34             | 10                     |
| 51          | 65.7                 | 44             | 67.8                   | 36             | 10                     |
| 52          | 10                   | 46             | 53.1                   | 39             | 10                     |
| 54          | 10                   | 50             | 21.3                   | 47             | 21.3                   |
| 56          | 10                   | 53             | 10                     | 57             | 54.6                   |
| 62          | 10                   | 55             | 10                     | 58             | 10                     |
| 64          | 10                   | 60             | 10                     | 59             | 10                     |
| 69          | 10                   | 73             | 10                     | 75             | 10                     |
| 77          | 10                   | 74             | 8.9                    | 76             | 10                     |
| <b>Mean</b> | <b>44.3</b>          | <b>Mean</b>    | <b>30.8</b>            | <b>Mean</b>    | <b>28.5</b>            |
| <b>SD</b>   | <b>55.7</b>          | <b>SD</b>      | <b>25.9</b>            | <b>SD</b>      | <b>32.4</b>            |

Note : IL-1 $\beta$  values below the LLOQ value of 20 pg/ml were set to 10 pg/mL (i.e. half of LLOQ).
