# Supplementary material for: Continuous administration of a p38α inhibitor during the subacute phase after transient ischemia-induced stroke in the rat promotes dose-dependent functional recovery accompanied by increase in brain BDNF protein level
Source: PubMed Central journal article supplement (PMC7717516; doi:10.1371/journal.pone.0233073), 2020-12-04
Supplement: pone.0233073.s004.pdf [file pone.0233073.s004.pdf]

## Statistical analysis details

**Table A. Body weight (BW) analysis by group during study**

|                          |                      |                |                |                 |
|--------------------------|----------------------|----------------|----------------|-----------------|
| Two-way ANOVA            |                      |                |                |                 |
| Source of Variation      | % of total variation | <i>P</i> value |                |                 |
| Interaction              | 0.30                 | 0.9864         |                |                 |
| Column Factor            | 0.72                 | 0.0109         |                |                 |
| BW                       | 67.24                | < 0.0001       |                |                 |
| Source of Variation      | P value summary      | Significant?   |                |                 |
| Interaction              | ns                   | No             |                |                 |
| Column Factor            | *                    | Yes            |                |                 |
| BW                       | ***                  | Yes            |                |                 |
| Source of Variation      | Df                   | Sum-of-squares | Mean square    | F               |
| Interaction              | 12                   | 2485           | 207.1          | 0.3162          |
| Column Factor            | 2                    | 5986           | 2993           | 4.569           |
| BW                       | 6                    | 557841         | 92974          | 141.9           |
| Residual                 | 402                  | 263304         | 655.0          |                 |
| Number of missing values | 39                   |                |                |                 |
| Bonferroni posttests     |                      |                |                |                 |
| Vehicle vs NFMD 1.5mg/kg |                      |                |                |                 |
| BW                       | Vehicle              | NFMD 1.5mg/kg  | Difference     | 95% CI of diff. |
| Day 1                    | 328.0                | 329.0          | 1.000          | -22.18 to 24.18 |
| Week 1                   | 309.0                | 326.0          | 17.00          | -5.094 to 43.09 |
| Week 2                   | 342.0                | 354.0          | 12.00          | -12.09 to 36.09 |
| Week 3                   | 369.0                | 378.0          | 9.000          | -15.09 to 33.09 |
| Week 4                   | 389.0                | 397.0          | 8.000          | -16.09 to 32.09 |
| Week 5                   | 404.0                | 412.0          | 8.000          | -16.09 to 32.09 |
| Week 6                   | 415.0                | 422.0          | 7.000          | -17.09 to 31.09 |
| BW                       | Difference           | t              | <i>P</i> value | Summary         |
| Day 1                    | 1.000                | 0.1265         | <i>P</i> >0.05 | ns              |
| Week 1                   | 19.00                | 2.311          | <i>P</i> >0.05 | ns              |
| Week 2                   | 12.00                | 1.460          | <i>P</i> >0.05 | ns              |
| Week 3                   | 9.000                | 1.095          | <i>P</i> >0.05 | ns              |
| Week 4                   | 8.000                | 0.9732         | <i>P</i> >0.05 | ns              |
| Week 5                   | 8.000                | 0.9732         | <i>P</i> >0.05 | ns              |
| Week 6                   | 7.000                | 0.8515         | <i>P</i> >0.05 | ns              |
| Vehicle vs NFMD 4.5mg/kg |                      |                |                |                 |
| BW                       | Vehicle              | NFMD 4.5mg/kg  | Difference     | 95% CI of diff. |
| Day1                     | 328.0                | 325.0          | -3.000         | -26.44 to 20.44 |
| Week 1                   | 309.0                | 321.0          | 12.00          | -10.09 to 38.09 |

|        |            |        |                |                 |
|--------|------------|--------|----------------|-----------------|
| Week 2 | 342.0      | 353.0  | 11.00          | -13.09 to 35.09 |
| Week 3 | 369.0      | 375.0  | 6.000          | -18.09 to 30.09 |
| Week 4 | 389.0      | 394.0  | 5.000          | -19.09 to 29.09 |
| Week 5 | 404.0      | 408.0  | 4.000          | -20.09 to 28.09 |
| Week 6 | 415.0      | 418.0  | 3.000          | -21.09 to 27.09 |
|        |            |        |                |                 |
| BW     | Difference | t      | <i>P</i> value | Summary         |
| Day 1  | -3.000     | 0.3752 | <i>P</i> >0.05 | ns              |
| Week 1 | 12.00      | 1.460  | <i>P</i> >0.05 | ns              |
| Week 2 | 11.00      | 1.338  | <i>P</i> >0.05 | ns              |
| Week 3 | 6.000      | 0.7299 | <i>P</i> >0.05 | ns              |
| Week 4 | 5.000      | 0.6082 | <i>P</i> >0.05 | ns              |
| Week 5 | 4.000      | 0.4866 | <i>P</i> >0.05 | ns              |
| Week 6 | 3.000      | 0.3649 | <i>P</i> >0.05 | ns              |

**Table B. Neuroscore mNSS value (NS) by group during study**

|                                    |                         |                  |                 |                  |
|------------------------------------|-------------------------|------------------|-----------------|------------------|
| Two-way ANOVA                      |                         |                  |                 |                  |
| Source of Variation                | % of total variation    | <i>P</i> -value  |                 |                  |
| Interaction                        | 4.37                    | <i>P</i> <0.0001 |                 |                  |
| Column Factor                      | 13.74                   | <i>P</i> <0.0001 |                 |                  |
| NS                                 | 62.24                   | <i>P</i> <0.0001 |                 |                  |
| Source of Variation                | <i>P</i> -value summary | Significant?     |                 |                  |
| Interaction                        | ***                     | Yes              |                 |                  |
| Column Factor                      | ***                     | Yes              |                 |                  |
| NS                                 | ***                     | Yes              |                 |                  |
| Source of Variation                | Df                      | Sum-of-squares   | Mean square     | F                |
| Interaction                        | 4                       | 45.2             | 11.3            | 9.674            |
| Column Factor                      | 2                       | 142.1            | 71.04           | 60.82            |
| NS                                 | 2                       | 643.8            | 321.9           | 275.5            |
| Residual                           | 174                     | 203.3            | 1.168           |                  |
| Number of missing values           | 15                      |                  |                 |                  |
| Bonferroni posttests               |                         |                  |                 |                  |
| Vehicle vs. NFMD 1.5mg/kg          |                         |                  |                 |                  |
| NS                                 | Vehicle                 | NFMD 1.5mg/kg    | Difference      | 95% CI of diff.  |
| Day 2                              | 14.3                    | 13.9             | -0.4            | -1.338 to 0.5376 |
| Week 4                             | 12.1                    | 10               | -2.1            | -3.075 to -1.125 |
| Week 6                             | 11.4                    | 9.4              | -2              | -2.975 to -1.025 |
| NS                                 | Difference              | t                | <i>P</i> -value | Summary          |
| Day 2                              | -0.4                    | 1.198            | <i>P</i> >0.05  | ns               |
| Week 4                             | -2.1                    | 6.049            | <i>P</i> <0.001 | ***              |
| Week 6                             | -2                      | 5.761            | <i>P</i> <0.001 | ***              |
| Vehicle vs. NFMD 4.5mg/kg          |                         |                  |                 |                  |
| NS                                 | Vehicle                 | NFMD 4.5mg/kg    | Difference      | 95% CI of diff.  |
| Day 2                              | 14.3                    | 13.9             | -0.4            | -1.348 to 0.5482 |
| Week 4                             | 12.1                    | 9.1              | -3              | -3.975 to -2.025 |
| Week 6                             | 11.4                    | 8.5              | -2.9            | -3.875 to -1.925 |
| NS                                 | Difference              | t                | <i>P</i> -value | Summary          |
| Day 2                              | -0.4                    | 1.185            | <i>P</i> >0.05  | ns               |
| Week 4                             | -3                      | 8.641            | <i>P</i> <0.001 | ***              |
| Week 6                             | -2.9                    | 8.353            | <i>P</i> <0.001 | ***              |
| NFMD 1.5mg/kg vs.<br>NFMD 4.5mg/kg |                         |                  |                 |                  |

| NS     | NFMD 1.5mg/kg | NFMD 4.5mg/kg | Difference | 95% CI of diff.   |
|--------|---------------|---------------|------------|-------------------|
| Day 2  | 13.9          | 13.9          | 0          | -0.9259 to 0.9259 |
| Week 4 | 10            | 9.1           | -0.9       | -1.837 to 0.03658 |
| Week 6 | 9.4           | 8.5           | -0.9       | -1.837 to 0.03658 |
|        |               |               |            |                   |
| NS     | Difference    | t             | P-value    | Summary           |
| Day 2  | 0             | 0             | $P>0.05$   | ns                |
| Week 4 | -0.9          | 2.698         | $P=0.03$   | *                 |
| Week 6 | -0.9          | 2.698         | $P=0.03$   | *                 |

**Table C. Change in absolute mNSS value (NS delta) by group over course of study (Day 2 - actual week)**

|                           |                         |                  |                 |                 |
|---------------------------|-------------------------|------------------|-----------------|-----------------|
| Two-way ANOVA             |                         |                  |                 |                 |
| Source of Variation       | % of total variation    | <i>P</i> -value  |                 |                 |
| Interaction               | 0.01                    | 0.9871           |                 |                 |
| Column Factor             | 32.51                   | <i>P</i> <0.0001 |                 |                 |
| NS delta                  | 2.67                    | 0.0322           |                 |                 |
| Source of Variation       | <i>P</i> -value summary | Significant?     |                 |                 |
| Interaction               | ns                      | No               |                 |                 |
| Column Factor             | ***                     | Yes              |                 |                 |
| NS delta                  | *                       | Yes              |                 |                 |
| Source of Variation       | Df                      | Sum-of-squares   | Mean square     | F               |
| Interaction               | 2                       | 0.06632          | 0.03316         | 0.01302         |
| Column Factor             | 2                       | 145.7            | 72.85           | 28.6            |
| NS delta                  | 1                       | 11.97            | 11.97           | 4.7             |
| Residual                  | 114                     | 290.4            | 2.547           |                 |
| Number of missing values  | 6                       |                  |                 |                 |
| Bonferroni posttests      |                         |                  |                 |                 |
| Vehicle vs. NFMD 1.5mg/kg |                         |                  |                 |                 |
| NS delta                  | Vehicle                 | NFMD 1.5mg/kg    | Difference      | 95% CI of diff. |
| Week 4                    | 2.1                     | 3.9              | 1.8             | 0.4990 to 3.101 |
| Week 6                    | 2.7                     | 4.5              | 1.8             | 0.4990 to 3.101 |
| NS delta                  | Difference              | t                | <i>P</i> -value | Summary         |
| Week 4                    | 1.8                     | 3.511            | <i>P</i> =0.003 | **              |
| Week 6                    | 1.8                     | 3.511            | <i>P</i> =0.003 | **              |
| Vehicle vs. NFMD 4.5mg/kg |                         |                  |                 |                 |
| NS delta                  | Vehicle                 | NFMD 4.5mg/kg    | Difference      | 95% CI of diff. |
| Week 4                    | 2.1                     | 4.7              | 2.6             | 1.299 to 3.901  |
| Week 6                    | 2.7                     | 5.4              | 2.7             | 1.399 to 4.001  |
| NS delta                  | Difference              | t                | P value         | Summary         |
| Week 4                    | 2.6                     | 5.072            | <i>P</i> <0.001 | ***             |
| Week 6                    | 2.7                     | 5.267            | <i>P</i> <0.001 | ***             |

**Table D. Stepping test (ST) by group during the study**

|                           |                         |                  |                 |                 |
|---------------------------|-------------------------|------------------|-----------------|-----------------|
| Two-way ANOVA             |                         |                  |                 |                 |
| Source of Variation       | % of total variation    | <i>P</i> -value  |                 |                 |
| Interaction               | 2.17                    | 0.0069           |                 |                 |
| Column Factor             | 61.41                   | <i>P</i> <0.0001 |                 |                 |
| ST                        | 12.64                   | <i>P</i> <0.0001 |                 |                 |
| Source of Variation       | <i>P</i> -value summary | Significant?     |                 |                 |
| Interaction               | **                      | Yes              |                 |                 |
| Column Factor             | ***                     | Yes              |                 |                 |
| ST                        | ***                     | Yes              |                 |                 |
| Source of Variation       | Df                      | Sum-of-squares   | Mean square     | F               |
| Interaction               | 2                       | 20.49            | 10.25           | 5.204           |
| Column Factor             | 2                       | 579.8            | 289.9           | 147.2           |
| ST                        | 1                       | 119.4            | 119.4           | 60.63           |
| Residual                  | 114                     | 224.5            | 1.969           |                 |
| Number of missing values  | 6                       |                  |                 |                 |
| Bonferroni posttests      |                         |                  |                 |                 |
| Vehicle vs. NFMD 1.5mg/kg |                         |                  |                 |                 |
| ST                        | Vehicle                 | NFMD 1.5mg/kg    | Difference      | 95% CI of diff. |
| Week 4                    | 7.6                     | 9.9              | 2.3             | 1.156 to 3.444  |
| Week 6                    | 8.7                     | 13               | 4.3             | 3.156 to 5.444  |
| ST                        | Difference              | t                | <i>P</i> -value | Summary         |
| Week 4                    | 2.3                     | 5.103            | <i>P</i> <0.001 | ***             |
| Week 6                    | 4.3                     | 9.541            | <i>P</i> <0.001 | ***             |
| Vehicle vs. NFMD 4.5mg/kg |                         |                  |                 |                 |
| ST                        | Vehicle                 | NFMD 4.5mg/kg    | Difference      | 95% CI of diff. |
| Week 4                    | 7.6                     | 12.6             | 5               | 3.856 to 6.144  |
| Week 6                    | 8.7                     | 14.4             | 5.7             | 4.556 to 6.844  |
| ST                        | Difference              | t                | <i>P</i> -value | Summary         |
| Week 4                    | 5                       | 11.09            | <i>P</i> <0.001 | ***             |
| Week 6                    | 5.7                     | 12.65            | <i>P</i> <0.001 | ***             |

**Table E. Body swing difference (BSW delta) by group during the study**

|                           |                         |                  |                 |                  |
|---------------------------|-------------------------|------------------|-----------------|------------------|
| Two-way ANOVA             |                         |                  |                 |                  |
| Source of Variation       | % of total variation    | <i>P</i> -value  |                 |                  |
| Interaction               | 0.34                    | 0.4979           |                 |                  |
| Column Factor             | 71.58                   | <i>P</i> <0.0001 |                 |                  |
| BSW delta                 | 0.35                    | 0.2299           |                 |                  |
| Source of Variation       | <i>P</i> -value summary | Significant?     |                 |                  |
| Interaction               | ns                      | No               |                 |                  |
| Column Factor             | ***                     | Yes              |                 |                  |
| BSW delta                 | ns                      | No               |                 |                  |
| Source of Variation       | Df                      | Sum-of-squares   | Mean square     | F                |
| Interaction               | 2                       | 19.96            | 9.981           | 0.7016           |
| Column Factor             | 2                       | 4188             | 2094            | 147.2            |
| BSW delta                 | 1                       | 20.72            | 20.72           | 1.457            |
| Residual                  | 114                     | 1622             | 14.23           |                  |
| Number of missing values  | 6                       |                  |                 |                  |
| Bonferroni posttests      |                         |                  |                 |                  |
| Vehicle vs. NFMD 1.5mg/kg |                         |                  |                 |                  |
| BSW delta                 | Vehicle                 | NFMD 1.5mg/kg    | Difference      | 95% CI of diff.  |
| Week 4                    | 15.9                    | 6.8              | -9.1            | -12.17 to -6.025 |
| Week 6                    | 16.2                    | 5.6              | -10.6           | -13.67 to -7.525 |
| BSW delta                 | Difference              | t                | <i>P</i> -value | Summary          |
| Week 4                    | -9.1                    | 7.511            | <i>P</i> <0.001 | ***              |
| Week 6                    | -10.6                   | 8.75             | <i>P</i> <0.001 | ***              |
| Vehicle vs. NFMD 4.5mg/kg |                         |                  |                 |                  |
| BSW delta                 | Vehicle                 | NFMD 4.5mg/kg    | Difference      | 95% CI of diff.  |
| Week 4                    | 15.9                    | 2.7              | -13.2           | -16.27 to -10.13 |
| Week 6                    | 16.2                    | 1.1              | -15.1           | -18.17 to -12.03 |
| BSW delta                 | Difference              | t                | <i>P</i> -value | Summary          |
| Week 4                    | -13.2                   | 10.9             | <i>P</i> <0.001 | ***              |
| Week 6                    | -15.1                   | 12.46            | <i>P</i> <0.001 | ***              |

**Table F. Forelimb placement (FP) test by group during the study**

|                           |                      |                |             |                  |
|---------------------------|----------------------|----------------|-------------|------------------|
| Two-way ANOVA             |                      |                |             |                  |
| Source of Variation       | % of total variation | P-value        |             |                  |
| Interaction               | 2.35                 | 0.0069         |             |                  |
| Column Factor             | 60.13                | P<0.0001       |             |                  |
| FP                        | 11.79                | P<0.0001       |             |                  |
| Source of Variation       | P value summary      | Significant?   |             |                  |
| Interaction               | **                   | Yes            |             |                  |
| Column Factor             | ***                  | Yes            |             |                  |
| FP                        | ***                  | Yes            |             |                  |
| Source of Variation       | Df                   | Sum-of-squares | Mean square | F                |
| Interaction               | 2                    | 27.92          | 13.96       | 5.202            |
| Column Factor             | 2                    | 714.7          | 357.3       | 133.2            |
| FP                        | 1                    | 140.1          | 140.1       | 52.2             |
| Residual                  | 114                  | 305.9          | 2.684       |                  |
| Number of missing values  | 6                    |                |             |                  |
| Bonferroni posttests      |                      |                |             |                  |
| Vehicle vs. NFMD 1.5mg/kg |                      |                |             |                  |
| FP                        | Vehicle              | NFMD 1.5mg/kg  | Difference  | 95% CI of diff.  |
| Week 4                    | 10.9                 | 8.3            | -2.6        | -3.935 to -1.265 |
| Week 6                    | 10.1                 | 5.5            | -4.6        | -5.935 to -3.265 |
| FP                        | Difference           | t              | P-value     | Summary          |
| Week 4                    | -2.6                 | 4.941          | P<0.001     | ***              |
| Week 6                    | -4.6                 | 8.742          | P<0.001     | ***              |
| Vehicle vs. NFMD 4.5mg/kg |                      |                |             |                  |
| FP                        | Vehicle              | NFMD 4.5mg/kg  | Difference  | 95% CI of diff.  |
| Week 4                    | 10.9                 | 6              | -4.9        | -6.235 to -3.565 |
| Week 6                    | 10.1                 | 3.1            | -7          | -8.335 to -5.665 |
| FP                        | Difference           | t              | P-value     | Summary          |
| Week 4                    | -4.9                 | 9.312          | P<0.001     | ***              |
| Week 6                    | -7                   | 13.3           | P<0.001     | ***              |

**Table G. IL-1 $\beta$  levels in injured right brain hemisphere at end of study**

|                                                            |            |        |                                 |         |                 |
|------------------------------------------------------------|------------|--------|---------------------------------|---------|-----------------|
| One-way analysis of variance                               |            |        |                                 |         |                 |
| <i>P</i> -value                                            | 0.6749     |        |                                 |         |                 |
| <i>P</i> -value summary                                    | ns         |        |                                 |         |                 |
| Are means significantly different?<br>( <i>P</i> <0.05)    | No         |        |                                 |         |                 |
| Number of groups                                           | 3          |        |                                 |         |                 |
| F                                                          | 0.4011     |        |                                 |         |                 |
| R square                                                   | 0.03856    |        |                                 |         |                 |
|                                                            |            |        |                                 |         |                 |
| Bartlett's test for equal variances                        |            |        |                                 |         |                 |
| Bartlett's statistic (corrected)                           | 5.646      |        |                                 |         |                 |
| <i>P</i> -value                                            | 0.0594     |        |                                 |         |                 |
| <i>P</i> -value summary                                    | ns         |        |                                 |         |                 |
| Do the variances differ significantly<br>( <i>P</i> <0.05) | No         |        |                                 |         |                 |
|                                                            |            |        |                                 |         |                 |
| ANOVA Table                                                | SS         | df     | MS                              |         |                 |
| Treatment (between columns)                                | 1092       | 2      | 546.1                           |         |                 |
| Residual (within columns)                                  | 27230      | 20     | 1362                            |         |                 |
| Total                                                      | 28323      | 22     |                                 |         |                 |
|                                                            |            |        |                                 |         |                 |
| Dunnett's Multiple Comparison Test                         | Mean Diff. | q      | Significant?<br><i>P</i> <0.05? | Summary | 95% CI of diff  |
| Vehicle vs. NFMD 1.5mg/kg                                  | 14.70      | 0.8199 | No                              | ns      | -27.95 to 57.35 |
| Vehicle vs. NFMD 4.5mg/kg                                  | 14.10      | 0.7076 | No                              | ns      | -33.30 to 61.50 |
