# Supplementary material for: Continuous administration of a p38α inhibitor during the subacute phase after transient ischemia-induced stroke in the rat promotes dose-dependent functional recovery accompanied by increase in brain BDNF protein level
Source: PubMed Central journal article supplement (PMC7717516; doi:10.1371/journal.pone.0233073), 2020-12-04
Supplement: pone.0233073.s005.pdf [file pone.0233073.s005.pdf]

## **BDNF statistical analysis details**

### **A) Jonckheere-Terpstra test for dose-response on BDNF levels: placebo < 1.5 mg/kg NFMD < 4.5 mg/kg NFMD**

#### Left hemisphere

Sample count by Group

[1] 18 18 18

Mann-Whitney count by Group

[1] 200.0 241.0 208.5

sum of Mann-Whitney counts = 649.5

expected sum of Mann-Whitney counts = 486

var of sum of Mann-Whitney counts = 3969

J statistic = 2.5952380952381

P-value = 0.00472627064544695

#### Right hemisphere

Sample count by Group

[1] 18 18 17

Mann-Whitney count by Group

[1] 170.5 204.0 196.0

sum of Mann-Whitney counts = 570.5

expected sum of Mann-Whitney counts = 468

var of sum of Mann-Whitney counts = 3753

J statistic = 1.67314886515417

P-value = 0.0471489969497616

## B) Kruskal-Wallis test with Dunn's post hoc test for multiple comparisons for analysis of BDNF levels in individual neflamapimod dose groups versus the vehicle group

### Left (non-injured) hemisphere

Kruskal-Wallis test

|                                         |             |
|-----------------------------------------|-------------|
| P value                                 | 0.0364      |
| Exact or approximate P value?           | Approximate |
| P value summary                         | *           |
| Do the medians vary signif. (P < 0.05)? | Yes         |
| Number of groups                        | 3           |
| Kruskal-Wallis statistic                | 6.627       |
| Data summary                            |             |
| Number of treatments (columns)          | 3           |
| Number of values (total)                | 54          |

| Dunn's multiple comparisons test | Mean rank diff. | Significant? | Summary    | Adjusted P Value | A-? |                |
|----------------------------------|-----------------|--------------|------------|------------------|-----|----------------|
| Vehicle vs. NFMD 1.5 mg/kg       | -6.028          | No           | ns         | 0.5006           | B   | NFMD 1.5 mg/kg |
| Vehicle vs. NFMD 4.5 mg/kg       | -13.47          | Yes          | *          | 0.0204           | C   | NFMD 4.5 mg/kg |
| Mean                             |                 |              |            |                  |     |                |
| Test details                     | Mean rank 1     | Mean rank 2  | rank diff. | n1               | n2  | Z              |
| Vehicle vs. NFMD 1.5 mg/kg       | 21.00           | 27.03        | -6.028     | 18               | 18  | 1.150          |
| Vehicle vs. NFMD 4.5 mg/kg       | 21.00           | 34.47        | -13.47     | 18               | 18  | 2.569          |

### Right (injured) hemisphere

Kruskal-Wallis test

|                                         |             |
|-----------------------------------------|-------------|
| P value                                 | 0.1937      |
| Exact or approximate P value?           | Approximate |
| P value summary                         | ns          |
| Do the medians vary signif. (P < 0.05)? | No          |
| Number of groups                        | 3           |
| Kruskal-Wallis statistic                | 3.282       |
| Data summary                            |             |
| Number of treatments (columns)          | 3           |
| Number of values (total)                | 53          |

| Dunn's multiple comparisons test | Mean rank diff. | Significant? | Summary         | Adjusted P Value | A-? |                |
|----------------------------------|-----------------|--------------|-----------------|------------------|-----|----------------|
| Vehicle vs. NFMD 1.5 mg/kg       | -1.389          | No           | ns              | >0.9999          | B   | NFMD 1.5 mg/kg |
| Vehicle vs. NFMD 4.5 mg/kg       | -8.835          | No           | ns              | 0.1813           | C   | NFMD 4.5 mg/kg |
| Mean                             |                 |              |                 |                  |     |                |
| Test details                     | Mean rank 1     | Mean rank 2  | Mean rank diff. | n1               | n2  | Z              |
| Vehicle vs. NFMD 1.5 mg/kg       | 23.69           | 25.08        | -1.389          | 18               | 18  | 0.2699         |
| Vehicle vs. NFMD 4.5 mg/kg       | 23.69           | 32.53        | -8.835          | 18               | 17  | 1.692          |
